# Ubiquitin-Related Modifiers of *Arabidopsis thaliana* Influence Root Development

Florian John<sup>‡a</sup>, Matthias Philipp, Ruth-Maria Leiber<sup>‡b</sup>, Sanae Errafi, Christoph Ringli\*

Institute of Plant Biology, University of Zürich, Zürich, Switzerland

## Abstract

Ubiquitins are small peptides that allow for posttranslational modification of proteins. Ubiquitin-related modifier (URM) proteins belong to the class of ubiquitin-like proteins. A primary function of URM proteins has been shown to be the sulfur transfer reaction leading to thiolation of tRNAs, a process that is important for accurate and effective protein translation. Recent analyses revealed that the *Arabidopsis* genome codes for two URM proteins, URM11 and URM12, which both are active in the tRNA thiolation process. Here, we show that *URM11* and *URM12* have overlapping expression patterns and are required for tRNA thiolation. The characterization of *urm11* and *urm12* mutants reveals that the lack of tRNA thiolation induces changes in general root architecture by influencing the rate of lateral root formation. In addition, they synergistically influence root hair cell growth. During the sulfur transfer reaction, URM proteins of different organisms interact with a thiouridylase, a protein-protein interaction that also takes place in *Arabidopsis*, since URM11 and URM12 interact with the *Arabidopsis* thiouridylase ROL5. Hence, the sulfur transfer reaction is conserved between distantly related species such as yeast, humans, and plants, and in *Arabidopsis* has an impact on root development.

**Citation:** John F, Philipp M, Leiber R-M, Errafi S, Ringli C (2014) Ubiquitin-Related Modifiers of *Arabidopsis thaliana* Influence Root Development. PLoS ONE 9(1): e86862. doi:10.1371/journal.pone.0086862

**Editor:** Markus Grebe, Umeå Plant Science Centre, Sweden

**Received:** May 16, 2013; **Accepted:** December 16, 2013; **Published:** January 22, 2014

**Copyright:** © 2014 John et al. This is an open-access article distributed under the terms of the Creative Commons Attribution License, which permits unrestricted use, distribution, and reproduction in any medium, provided the original author and source are credited.

**Funding:** Funding by Swiss National Science Foundation Grant Nrs 122157 and 138472/1. The funders had no role in study design, data collection and analysis, decision to publish, or preparation of the manuscript.

**Competing Interests:** The authors have declared that no competing interests exist.

\* E-mail: chringli@botinst.uzh.ch

<sup>‡a</sup> Current address: Thermo Scientific, Wohlen, Switzerland

<sup>‡b</sup> Current address: Tecan, Männedorf, Switzerland

## Introduction

Ubiquitins (Ub) are small peptides that allow posttranslational modification of proteins. Ubiquitylation is the reversible attachment of Ub to proteins involving activation, conjugation, and ligation of Ub via corresponding E1, E2, and E3 ligase activities, respectively [1]. While polyubiquitylation targets proteins to degradation via the proteasome, single ubiquitylation has non-proteolytic effects on cellular processes such as transcription, chromatin modifications, or vesicle dynamics. In addition to ubiquitin, a number of ubiquitin-like modifiers are present in most eukaryotes that are also able to tag proteins, usually in a transient manner [2–4].

In addition to Ub, ubiquitin-related modifiers (URMs) were identified that are not highly homologous to ubiquitin in respect to the amino acid sequence but share a  $\beta$ -grasp motif as typical structural feature of this type of protein. The primary identified function of URM and URM-related peptides in many different organisms such as archaea, yeast, and eukaryotes is as sulfur carriers in tRNA thiolation [5–10]. This process involves activation of URM by an E1-like protein such as Uba4p of yeast which adenylates URMs and transfers sulfur to the terminal glycine resulting in a thiocarboxylate. With the activity of thiouridylases such as Nsc2p and Ncs6p in yeast, the thiol group is then transferred onto uridine residues of tRNAs, a modification which is thought to increase translation efficiency [11]. The function of URMs in thiolation of tRNAs is reminiscent of sulfur transfer reactions in prokaryotes in the synthesis of molybdopterin

and thiamine. The MoaD/ThiS proteins involved in this process are not homologous in sequence to URMs, yet also show the  $\beta$ -grasp motif [12]. Hence, URM-type proteins appear to have an activity different from other ubiquitin-related proteins and, because of their similarity to prokaryotic sulfur transfer systems, are considered to be evolutionary intermediates between prokaryotic sulfur transfer and eukaryotic ubiquitin-like protein conjugation systems [13]. In addition to the established role of URM proteins in tRNA thiolation, there is increasing evidence for a second role of URMs in urmylation, a protein modification similar to ubiquitylation in which URMs are conjugated to lysine of target proteins [14], [15].

Recently, two *Arabidopsis* genes, *URM11* and *URM12*, were identified encoding proteins that are involved in tRNA thiolation [16]. *URM11* and *URM12* show homology to URM proteins of other organisms and share the  $\beta$ -grasp motif and the terminal diglycine motif typical for these proteins. In addition to *URM11* and *URM12*, the *Arabidopsis* homologs of the yeast E1-ligase Uba4p and thiouridylase Ncs6p were identified as *CNX5/SIR1* and *ROL5*, respectively. Both these *Arabidopsis* proteins have been shown to be involved in the tRNA thiolation process. *cnx5/sir1* mutants show a severe growth defect, whereas the *rol5* mutant is mainly affected in root growth and shows changes in cell wall architecture. The enhanced severity of the *cnx5/sir1* mutant phenotype compared to *rol5* is likely caused by a general defect in sulfur transfer reactions in this mutant that also affects molybdopterin biosynthesis [16–19].

This work presents a more detailed characterization of URM11 and URM12 of Arabidopsis. Our data support the finding that URM11 and URM12 are involved in tRNA thiolation. The protein interactions of the URM proteins are conserved in plants, as they interact with the thioridylase ROL5. Even though *URM11* is expressed to a higher level than *URM12*, there is a significant synergistic interaction between the two proteins. Finally, the analysis of mutants including a *urm11 urm12* double mutant shows that the lack of tRNA thiolation has an effect on the general root architecture but also on root cell development.

## Results

### Arabidopsis Possesses Two Proteins with High Sequence and Functional Similarity to Yeast Urm1p

Proteins with significant homology to ubiquitin-related modifier (URM) proteins have been identified in a number of organisms. The genome of Arabidopsis harbors two *URM* genes, (*At2g45695* and *At3g61113*, respectively) which were termed *URM11* and *URM12* [16]. URM11 and URM12 are homologous to the yeast and human URM proteins, particularly in the C-terminal half including the terminal di-glycine motif essential for URM protein function. This suggests that the C-terminus is less tolerant to variations in amino acid sequence. The two URM proteins of Arabidopsis share high homology to each other with an identity of 87% and a similarity of 91% (Figure 1; [16]).

The involvement of URM11 and URM12 in the sulfur carrier process important for the thiolation of eukaryotic cytoplasmic transfer RNAs (tRNAs) was indicated by the successful complementation of the yeast  $\Delta$ *urm1* mutant defective in tRNA thiolation [8] with *URM11* and *URM12* [16]. To assess whether URM proteins fused to reporter proteins can be used to assess localization of URM proteins, complementation efficiency of the yeast  $\Delta$ *urm1* mutant by URM and GFP-URM proteins was compared. The  $\Delta$ *urm1* mutant transformed with cDNAs for *URM11* or *GFP-URM11* and *GFP-URM12* constructs under the control of a constitutively active yeast promoter was analyzed for the presence of thiolated tRNAs. The binding of N-acryloylamino phenyl mercuric chloride (APM) to 2-thiouridine residues leads to the retardation of thiolated tRNAs in acrylamide gels, making them readily detectable. The thiolated tRNAs detectable in wild-type yeast but absent in the  $\Delta$ *urm1* mutant are present in the  $\Delta$ *urm1* mutant complemented with either *GFP-URM11* or *GFP-URM12* to an extent that is comparable to the complementation with *URM11* (Figure 2A). This confirms the finding by [16] that the Arabidopsis URM proteins are functional in the sulfur transfer reaction in yeast. Furthermore, this experiment shows that URM11 and URM12 are active with an additional GFP reporter

protein at the N-terminus that is considerably bigger in size than the URM proteins.

### URM11 and URM12 Accumulate in the Cytoplasm and the Nucleus

In a next step, we aimed at analyzing the subcellular localization of the Arabidopsis URM proteins. Since URM11 and URM12 appear to be functionally equivalent, URM11 subcellular localization was investigated in onion cells transiently transformed with *35S:GFP-URM11* and *35S:GFP*. Both the GFP-URM11 fusion protein as well as GFP alone localize to the cytoplasm and show a signal in the nucleus (Figure S1). Since URM proteins are short peptides, it cannot be excluded that the GFP moiety influences protein localization. Therefore, localization was also investigated by an alternative strategy, namely by analyzing the distribution of an HA-URM11 protein in transgenic *urm11 urm12* double mutants (see below). Immunodetection by western blotting of proteins from a total plant extract or a purified nuclear preparation revealed the presence of HA-URM11 in both fractions that migrated at the expected mass of around 13 kDa. In contrast, the histone H3 protein was only detectable in the nuclear preparation and not in the total fraction, confirming a strong enrichment of nuclear proteins in the nuclear fraction (Figure 2B). The detection of HA-URM11 in the nuclear protein preparation suggests that a fraction of URM11 and possibly URM proteins in general localize to the nucleus. This is in line with the data of the high-throughput analysis of protein localization in yeast (<http://yeastgfp.yeastgenome.org>; [20]).

### Arabidopsis URM Proteins Interact with ROL5

The protein network leading to tRNA thiolation has been investigated in detail in yeast. Within this network, Urm1p interacts with the thioridylase Ncs6p [7], [8]. To get an insight into the degree of conservation of this network in Arabidopsis, URM11 and URM12 were tested for interaction with ROL5, the Arabidopsis thioridylase and functional homolog of Ncs6p [19]. To this end, a yeast-two-hybrid experiment was performed using ROL5 as the bait protein and URM11 or URM12 as the prey proteins. For both URM proteins, an interaction with ROL5 was observed as cells grew on selective medium and resulted in GUS activity. Control experiments with the *ROL5*-containing bait vector and an empty prey vector or the empty bait vector with the *URM11*- or *URM12*-containing prey vectors revealed no autoactivation of any of the proteins (Figure 2C). The interaction of URM11 and URM12 with ROL5 provides further evidence for the conservation of the process of sulfur transfer leading to tRNA modification across a wide range of species.

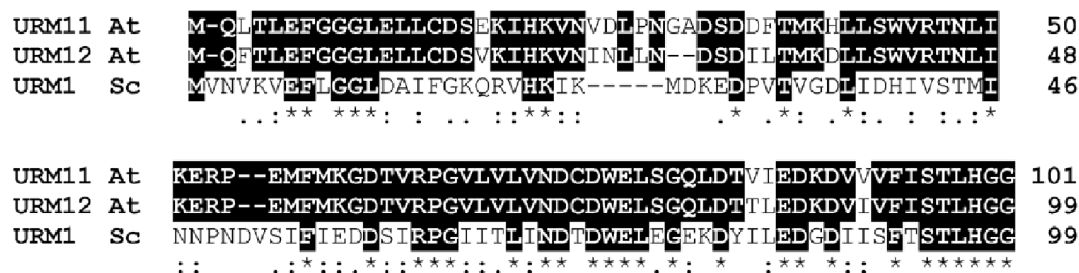

**Figure 1. Homology between URM proteins of Arabidopsis and yeast.** Alignment of the Arabidopsis URM11, URM12, and the yeast Urm1p. Identical positions are indicated in black, colons indicate conservative amino acid substitutions, and periods indicate similar amino acids. doi:10.1371/journal.pone.0086862.g001

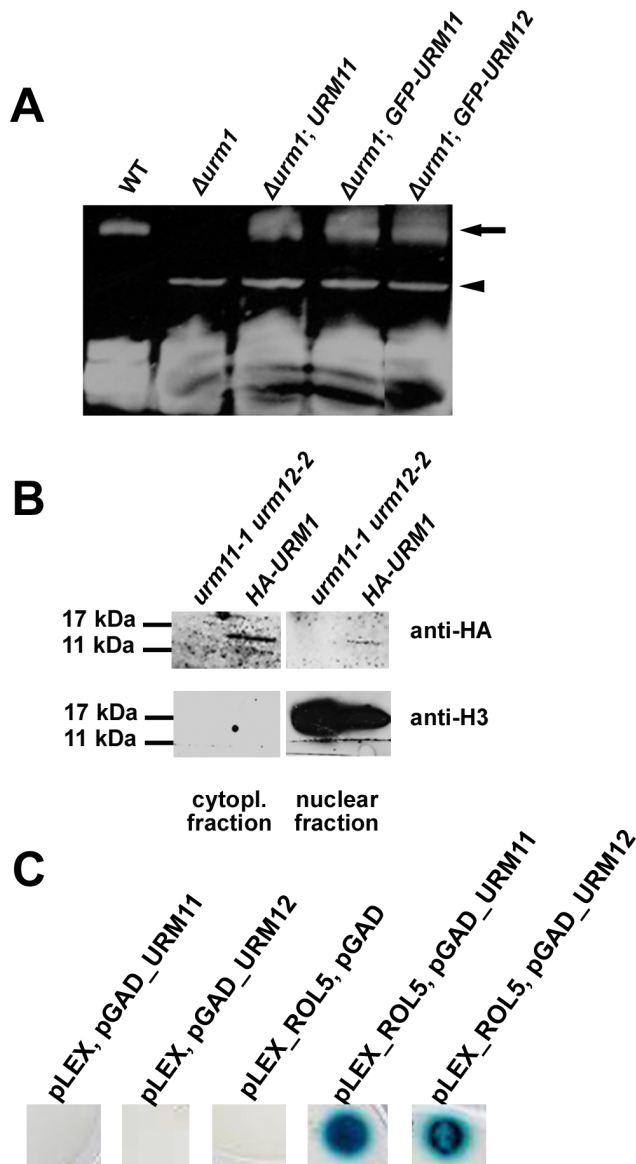

**Figure 2. Properties and activities of URM11 and URM12.** (A) Bulk tRNA was extracted from wild-type (WT),  $\Delta urm1$  and  $\Delta urm1$  yeast strains complemented with *URM11* or *URM12*. Thiolated tRNAs (arrow) show slower migration than non-thiolated tRNAs (bottom of gel) in an acrylamide gel containing APM. A band of unknown nature (arrowhead) occasionally occurred. *URM11* and the GFP-*URM* fusion proteins of Arabidopsis are functional in yeast, resulting in tRNA thiolation in the otherwise thiolation-defective  $\Delta urm1$  mutant. A representative result of several repetitions is shown. (B) Western blotting of total protein extracts and purified nuclei of *urm11-1 urm12-2* double mutants expressing *HA-URM11* or non-transgenic double mutants. Immunoblotting was done with an anti-*HA* (upper lane) and an anti-histone H3 (lower lane) antibody. The experiment was performed twice with comparable outcome. (C) A representative result of the yeast two-hybrid experiment (performed three times independently) revealed the interaction of *URM11* and *URM12* with *ROL5*, resulting in yeast growth on selective medium and blue staining of the cells due to  $\beta$ -galactosidase activity. Transformation with only one of two constructs with the empty second plasmid did not result in yeast growth and  $\beta$ -galactosidase activity.  
doi:10.1371/journal.pone.0086862.g002

### *URM11* and *URM12* are Ubiquitously Expressed

According to microarray data of the Genevestigator platform [21], *URM11* and *URM12* are expressed at all developmental stages of Arabidopsis. To investigate *URM11* and *URM12* expression patterns in more detail, the promoter sequences of *URM11* and *URM12* were fused to the *GUS* gene and transformed into Arabidopsis. Several independent transgenic lines were then screened in the  $T_2$  generation for *GUS* activity at seedling and adult stage and representative examples are shown in Figure 3. At the seedling stage, the *URM11* promoter induced homogenous *GUS* expression while *URM12* promoter-induced *GUS* expression was mainly detectable in the vasculature. In adult plants, *GUS* activity was found in most tissues, with *URM11:GUS* resulting in a stronger *GUS* staining than *URM12:GUS*, which is in agreement with microarray data that found *URM11* to be expressed at a higher level [21]. Again, staining was particularly strong in the vascular tissue. This shows that expression of *URM11* and *URM12* is largely overlapping.

### Mutations in the *URM* Genes Affect tRNA Modification and Root Development

To determine the significance of *URM11* and *URM12* for plant development, T-DNA insertion lines of these loci were identified. For *URM11*, one insertion line (*urm11-1*) was used which contains a T-DNA insertion in the first intron. For *URM12*, two insertion lines were used; *urm12-1* harbors the insertion 250 bp upstream of the start codon and *urm12-2* in the first intron (Figure 4A, allele nomenclature according to [16]). RT-PCR experiments on total RNA extracted from homozygous mutants revealed that the *urm12-1* line still produced *URM12* mRNA (data not shown). By contrast, both *urm11-1* and *urm12-2* lack detectable levels of gene expression of *URM11* and *URM12*, respectively (Figure 4B).

To test whether the absence of *URM* expression has an effect on tRNA thiolation, tRNAs were isolated from wild-type and *urm11-1 urm12-2* double mutant plants. Previously, a strong but not complete reduction in tRNA thiolation has been shown for the *urm11-1* mutant [16]. As a control, tRNA of the *rol5-1* mutant was isolated which was previously shown to lack thiolated tRNAs [19]. A shifted tRNA band, i.e. thiolated tRNAs, were observed only in the wild type but neither in *rol5-1* nor in the *urm11-1 urm12-2* double mutant (Figure 4C), indicating that this tRNA modification is impaired in the absence of *URM11* and *URM12*.

To investigate the importance of *URM11* and *URM12* for plant development, the *urm11-1 urm12-2* double mutant was analyzed, since *URM11* and *URM12* appear to have a very similar if not identical activity and thus are likely to be functionally redundant. A defect in lateral root development was observed in the double mutant. After growth for ten days, double mutant seedlings had developed a lower density of lateral roots compared to the wild type (Figure 5A). No obvious defect or retardation in shoot development was observed in the double mutant. To test whether the lateral root phenotype is indeed caused by the *urm11-1* and *urm12-2* mutations, the double mutant line was complemented with a *35S:HA-URM11* or *35S:HA-URM12* construct. Complementation with either of the two constructs resulted in wild type-like lateral root formation (Figure 5A), confirming that the absence of *URM11* and *URM12* induces the reduction in lateral root formation and that both *HA-URM* proteins are functional.

The locus coding for the *URM11* and *URM12*-interacting protein *ROL5* was previously identified as a suppressor of the root hair formation mutant *bx1* [19]. Since *ROL5*, *URM11*, and *URM12* are involved in the same process, we explored whether mutations in the *URM* genes have the same effect on *bx1*. As shown in Figure 5B, root hairs are regularly formed in wild-type

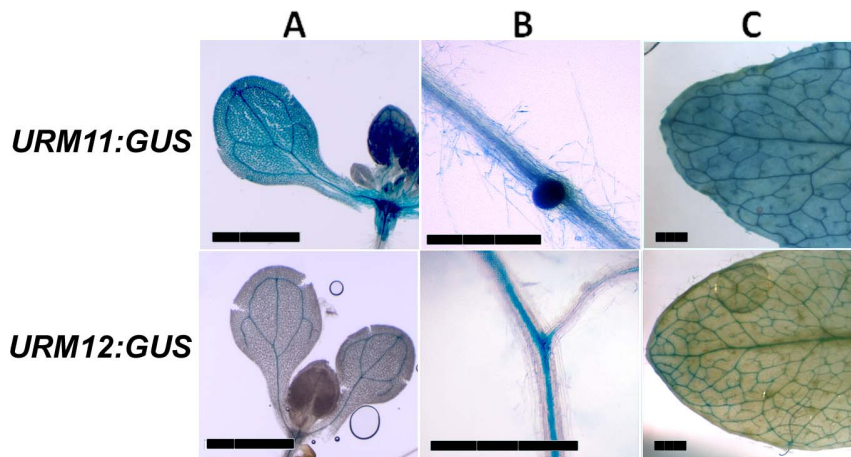

**Figure 3. Expression patterns of *URM11* and *URM12*.** The expression pattern of both genes was investigated by promoter *GUS* fusion constructs in transgenic Arabidopsis. The *URM11:GUS* construct led to a homogeneous *GUS* staining at the seedling stage and the adult stage. *URM12:GUS* is predominantly active in vascular tissue. Shoots (A) and roots (B) of seedlings and cauline leaves of adult plants (C) are shown. Bars = 2.5 mm. doi:10.1371/journal.pone.0086862.g003

seedlings, whereas they are malformed or absent in the *lrx1* mutant. This defect is indeed suppressed in the *lrx1 um11-1 um12-2* triple mutant, which showed wild type-like root hair development. By contrast, the *lrx1 um11-1* and *lrx1 um12-2* double mutants showed largely an *lrx1* phenotype (Figure 5B). Hence, the *um11-1* and *um12-2* mutations synergistically interact, which provides further evidence for *URM11* and *URM12* having similar functions during root development. The *um11-1 um12-2* double mutant, however, did not reveal aberrant root hair morphology compared to the wild type (data not shown). Finally, the *lrx1 um11-1 um12-2* triple mutant was complemented with *35S:HA-URM11* and *35S:HA-URM12* constructs. Transgenic lines expressing either of the two *URM* genes developed an *lrx1*-like root hair phenotype (Figure 5C), confirming that the mutations in the two *URM* loci account for suppression of *lrx1*.

## Discussion

Ubiquitin-related modifier proteins (URMs) are found in phylogenetically distantly related species. They can have a low level of identity or similarity, as found for Arabidopsis *URM11* and *URM12* versus the yeast *Urm1p* or human *Urm1* [16], but are conserved in the  $\beta$ -grasp, a characteristic structure consisting of a core with a pocket of four  $\beta$ -strands and diagonally arranged  $\alpha$ -helices, and the C-terminal di-glycine motif [1], [3], [4]. Despite the limited conservation in the primary sequence, Arabidopsis *URM* genes are able to complement the tRNA thiolation defect of the yeast  $\Delta$ *Urm1* mutant ([16]; this work). Our data also show that GFP-*URM* fusion proteins are functional, which allows a GFP-based analysis of protein accumulation in future studies. In the sulfur transfer reaction, *URM* proteins interact with a thiouridylase. This interaction is also conserved in Arabidopsis, since *URM11* and *URM12* interact with the Arabidopsis thiouridylase *ROL5*, a protein that is essential for the sulfur transfer reaction, as the *rol5* mutant is also defective in tRNA thiolation [19]. In addition to *ROL5*, *URM11* and *URM12* have been shown to interact with the E1 ligase *SIR1/CNX5* which is important for activation of the *URM* proteins and essential for tRNA thiolation [16]. Hence, to this point, interactions within the sulfur transfer reaction are well conserved in a diverse range of organisms.

## Mutations in *URM11* and *URM12* Affect Root Development

The thiolation of the uridine in the wobble position of tRNAs conferred by the protein network involving *URM* proteins is assumed to increase codon-anticodon accuracy, while blocking this tRNA modification is expected to have a negative impact on translation efficiency [11]. However, absence of tRNA thiolation does not have a deleterious impact on the organism. Both the yeast  $\Delta$ *Urm1* mutant [5], [22] and the Arabidopsis *um11-1 um12-2* double mutant are missing detectable levels of thiolated tRNAs but are viable. However, in both organisms, the growth process is affected. The Arabidopsis *um11-1 um12-2* double mutant develops a modified root architecture with a lower lateral root density compared to the wild type. Lateral root formation is under the control of auxin and cytokinin, but is also strongly influenced by nutrient availability [23–25]. This is similar to yeast where the mutant  $\Delta$ *Urm1* is impaired in pseudohyphal growth, a developmental response to nutrient limitation [22]. Thus, *URM* proteins of yeast and Arabidopsis, and possibly *URM* proteins in general, affect processes that are modified by environmental conditions.

In addition to lateral root formation, mutations in *URM11* and *URM12* also affect root hair development. Even though the *um11-1 um12-2* double mutant does not show impaired root hair growth, it does suppress the root hair formation mutant *lrx1*. *LRX1* is an extracellular protein that is involved in root hair cell wall formation [26–28]. The thiouridylase-defective *rol5* mutant was initially isolated as a suppressor of *lrx1* [19], which is the reason why a suppression of *lrx1* was tested in the *lrx1 um11-1 um12-2* triple mutant. The comparable effect of *rol5* and the *um11-1 um12-2* double mutant suggests that interfering with tRNA modification is causing the suppression of *lrx1*. Since *lrx1* is a cell wall formation mutant, suppression is likely induced by changes in cell wall structures. Indeed, the *rol5* mutant was shown to induce modifications in cell wall structures [19]. A possible mechanism by which changes in tRNA thiolation can affect root architecture and cell wall formation is via the TOR (Target Of Rapamycin) signaling network. The TOR network is a growth controller in eukaryotic cells that senses growth factors and nutrient availability and modulates cellular processes such as translation, ribosome biogenesis, mitochondrial activity, or cytoskeletal dynamics [29]. Alterations in tRNA thiolation modify

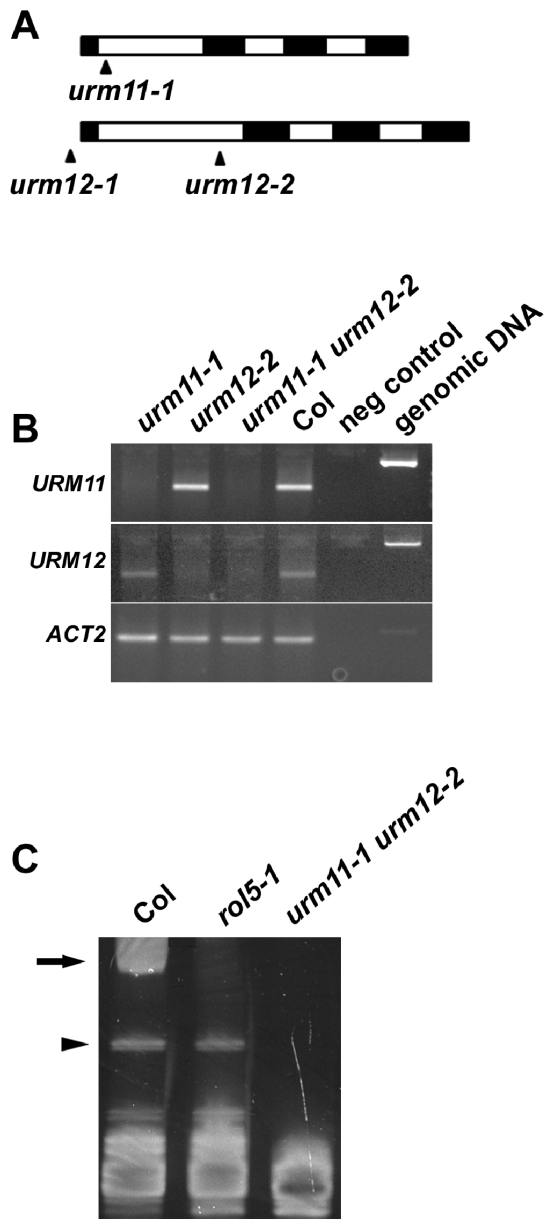

**Figure 4. *urm11 urm12* double mutant fails to thiolate tRNAs.** (A) Schematic structure of *URM11* and *URM12*. Black boxes represent exons and white boxes introns. T-DNA insertions are highlighted by black arrows and are located in the first intron for *urm11-1* and *urm12-2*, which were further analyzed. (B) RT-PCR on total RNA of entire seedlings revealed absence of *URM11* and *URM12* mRNA in the corresponding mutants. The *ACTIN2* gene was amplified as a control for comparable RNA extraction efficiency. PCR on genomic DNA reveal larger products due to introns. (C) The *urm11-1 urm12-2* double mutant is impaired in tRNA thiolation. In the presence of APM, thiolated tRNAs show slower migration in an acrylamide gel, non-thiolated tRNAs migrate faster (bottom of the gel). In contrast to the wild type, *rol5-1* and *urm11-2 urm12-2* mutants lack thiolated tRNAs (arrow). Bands of unknown nature (arrowhead) occasionally occurred. Representative examples of several independent experiments are shown. Col: wild-type Columbia.

doi:10.1371/journal.pone.0086862.g004

translation efficiency and have been shown to modulate TOR signaling [11], [22]. In addition, tRNAs are involved in nutritional stress responses via modulating TOR activity [30].

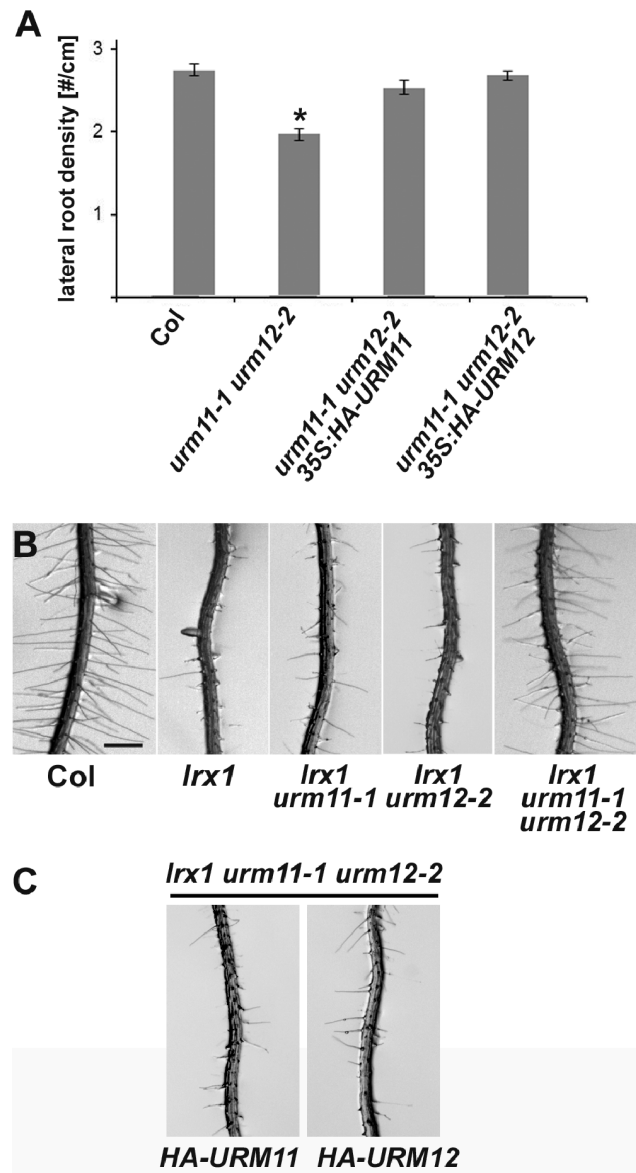

**Figure 5. Effects of *urm11-1 urm12-2* on root development.** (A) Lateral root density is reduced in the *urm11-1 urm12-2* double mutant compared to the wild type. Complementation with a *35S:HA-URM11* or *35S:HA-URM12* construct restores lateral root formation. Error bars represent the standard error, the asterisk indicates the only value significantly different from the others (two-sided t-test;  $p=0.01$ ;  $n\geq 25$ ). (B) In contrast to the wild type (*Col*), *lrx1* mutants frequently have collapsed root hairs. While *urm11-1* or *urm12-2* have no effect on *lrx1*, an *lrx1 urm11-1 urm12-2* triple mutant shows suppression of *lrx1* and develops wild type-like root hairs. (C) Suppression of *lrx1* by *urm11-1 urm12-2* is complemented with either *35S:HA-URM11* or *35S:HA-URM12*, resulting in the *lrx1* root hair phenotype. Col: wild-type Columbia. Bar=0.5 mm.

doi:10.1371/journal.pone.0086862.g005

In Arabidopsis, inhibiting the TOR network by rapamycin, a macrocyclic lactone specifically inhibiting the TOR kinase [31], leads to fewer lateral roots, modification of cell wall structures, and suppression of the *lrx1* root hair mutant phenotype [19], [32], [33]. Thus, the phenotypes caused by interfering with TOR signaling by rapamycin treatment are comparable to those observed in the *rol5* and *urm11-1 urm12-2* mutant lines, supporting the hypothesis that alterations in tRNA thiolation have an impact on TOR signaling.



ura3Δ 0, and the *Aum1* strain has the relevant genotype BY4741; Mat a; his3D1; leu2D0; met15D0; ura3D0; YIL008w::kanMX4. Yeast strains were grown at 30°C for 2 d on SD plates supplemented with His, Leu, Ade for strains complemented with *pFL61* constructs and His, Leu, Ade and Ura for growth of the wild type.

### Transient Gene Expression in Onion Epidermal Cells

For transient gene expression, onion epidermal cells were transformed by particle bombardment as described [42]. Bombarded tissue was incubated for 1 day at room temperature and the fluorescence pattern was microscopically analyzed.

### Isolation of Nuclear Proteins and Western Blotting

Nuclei were isolated from 1 gram (fresh weight) Arabidopsis 2-week old seedlings grown under sterile conditions following the protocol of [43].

For western blotting, proteins were prepared by mixing nuclear extracts or total seedling material with standard SDS-PAGE loading buffer prior to heat denaturation. SDS-PAGE, blotting onto nitrocellulose, and immunodetection by ECL technology was performed as described by Ringli [44]. Immunodetection was performed using a rat anti-HA antibody (Roche, # 11867423001) and a rabbit anti-histone H3 antibody (Abcam, Ab # 1791), followed by horseradish-coupled goat anti-rabbit and anti-rat antibodies (Santa Cruz Biotechnology, # sc-2004 and sc-2006, respectively), all of which were used in 1:3000 dilutions.

### Microscopy

Epidermal GFP fluorescence was analyzed using a Zeiss Imager Z1 microscope equipped with an Axiocam HRC. GFP fluorescence of yeast cells was analyzed with a Leica DM6000 equipped with a Leica BFC 350FX. Phenotypic observations and *GUS* expression analysis were done with a Leica LZ M125 stereomicroscope. Data points of lateral root development represent  $\geq 25$  seedlings. The experiment was done several times. For the root hair phenotype, over 30 seedlings of each line were analyzed.

### RNA Extraction and RT-PCR

Seedlings were grown vertically on half-strength MS Medium in a vertical orientation for 7 d as described above. The tissue of 120 entire seedlings was frozen in liquid nitrogen and grinded. The powder was then used for RNA extraction using the SV Total RNA isolation System kit (Promega). The reverse transcription was conducted with 500 ng of total RNA using the *i*-script kit (Biorad). One tenth of the obtained cDNA was then used for RT-PCR using the primer pairs *ACT1N2F* (59-AATGAGCTTCG-TATTGCTCC-39) and *ACT1N2R* (59GCACAGTGTGAGACA-CACC-39), *URM11\_rt\_for* (ATGCAATTAACCTCTT-GAATTTCG)/*URM11\_rt\_rev*(TTATCCACCATGCAAAGTG-

GAA), and *URM12\_rt\_for*(ATGCAATTTACTCTTGAGTTTCG)/*URM12\_rt\_rev* (TCATCCACCGTGCAGAGTCGAA). The *ACT1N2* PCR was done with 25 cycles, the *URM* PCRs with 30 cycles of amplification.

### tRNA Extraction and Analysis

Arabidopsis seedlings were grown vertically on plates for 14 d as described. Approximately 250 seedlings were used for extraction. The seedlings were grinded in liquid nitrogen and the material was extracted two times with 8 ml acidic phenol (Sigma), 0.8 ml chloroform and once with 4 ml acidic phenol, 0.4 ml chloroform.

Yeast strains were grown at 30°C in 50 ml liquid SD media supplemented with His, Leu, Ade for strains complemented with *pFL61* constructs and His, Leu, Ade and Ura for growth of the wild type or *Aum1* mutant. The tRNA was extracted 2 times with 4 ml acidic phenol, 0.4 ml chloroform.

After extraction of the plant or yeast material, tRNA was purified with AX100 columns from MACHEREY NAGEL following manufacturer's instructions. For analysis, the purified tRNA was separated on an acrylamide gel supplemented with N-acryloylamino phenyl mercuric chloride (APM) by the method adapted from [11].

### Accession Numbers

The Arabidopsis genes discussed in this study have the following accession numbers: *URM11*: At2g45695; *URM12*: At3g61113; *LRX1*: At1g12040; *ROL5*: At2g44270.

### Supporting Information

**Figure S1 Arabidopsis GFP-URM11 localizes to the cytoplasm and the nucleus.** Transient transformation of *35S::GFP-URM11* and *35S::GFP* into onion cells results in a comparable pattern of cytoplasmic and nuclear fluorescence. For each construct, at least 15 transformed cells were analyzed. Bar = 100  $\mu$ m. (TIF)

### Acknowledgments

We are grateful to Anja Meury Bechtel for excellent technical assistance, to Dr. S. Leidel for providing the *Aum1* yeast mutant strain and APM for the tRNA retardation assay, and Dr. Céline Jäger-Baroux for providing the anti-histone H3 antibody.

### Author Contributions

Conceived and designed the experiments: FJ MP R-ML CR. Performed the experiments: FJ MP R-ML SE CR. Analyzed the data: FJ R-ML MP SE CR. Contributed reagents/materials/analysis tools: FJ MP R-ML SE. Wrote the paper: FJ CR.

### References

- Kerscher O, Felberbaum R, Hochstrasser M (2006) Modification of proteins by ubiquitin and ubiquitin-like proteins. *Annu Rev Cell Dev Biol* 22: 159–180.
- Hochstrasser M (2009) Origin and function of ubiquitin-like proteins. *Nature* 458: 422–429.
- Park HJ, Kim WY, Park HC, Lee SY, Bohnert HJ, et al. (2011) SUMO and SUMOylation in plants. *Mol Cells* 32: 305–316.
- Vierstra R (2012) The expanding universe of ubiquitin and ubiquitin-like modifiers. *Plant Physiol* 160: 2–14.
- Furukawa K, Mizushima N, Noda T, Ohsumi Y (2000) A protein conjugation system in yeast with homology to biosynthetic enzyme reaction of prokaryotes. *J Biol Chem* 275: 7462–7465.
- Xu J, Zhang J, Wang L, Zhou J, Huang H, et al. (2006) Solution structure of Urm1 and its implications for the origin of protein modifiers. *Proc Natl Acad Sci USA* 103: 11625–11630.
- Schlieker CD, Van der Veen AG, Damon JR, Spooner E, Ploegh HL (2008) A functional proteomics approach links the ubiquitin-related modifier Urm1 to a tRNA modification pathway. *Proc Natl Acad Sci USA* 105: 18255–18260.
- Leidel S, Pedrioli PG, Bucher T, Brost R, Costanzo M, et al. (2009) Ubiquitin-related modifier Urm1 acts as a sulfur carrier in thiolation of eukaryotic transfer RNA. *Nature* 458: 228–232.
- Noma A, Sakaguchi Y, Suzuki T (2009) Mechanistic characterization of the sulfur-relay system for eukaryotic 2-thiouridine biogenesis at tRNA wobble positions. *Nucl Acids Res* 37: 1335–1352.
- Miranda HV, Nembhard N, Su D, Hepowitz N, Krause DJ, et al. (2011) E1- and ubiquitin-like proteins provide a direct link between protein conjugation and sulfur transfer in archaea. *Proc Natl Acad Sci USA* 108: 4417–4422.

11. Björk GR, Huang B, Persson OP, Byström AS (2007) A conserved modified wobble nucleoside (mcm5s2U) in lysyl-tRNA is required for viability in yeast. *RNA* 13: 1245–1255.
12. Kessler D (2006) Enzymatic activation of sulfur for incorporation into biomolecules in prokaryotes. *FEMS Microbiol Rev* 30: 825–840.
13. Wang F, Liu M, Qiu R, Ji C (2011) The dual role of ubiquitin-like protein Urm1 as a protein modifier and sulfur carrier. *Protein Cell* 2: 612–619.
14. Goehring AS, Rivers DM, Sprague GF (2003) Attachment of the ubiquitin-related protein Urm1p to the antioxidant protein Ahp1p. *Eukaryot Cell* 2: 930–936.
15. Van der Veen AG, Schorpp K, Schlieker C, Buti L, Damon JR, et al. (2011) Role of the ubiquitin-like protein Urm1 as a noncanonical lysine-directed protein modifier. *Proc Natl Acad Sci USA* 108: 1763–1770.
16. Nakai Y, Harada A, Hashiguchi Y, Nakai M, Hayashi H (2012) Arabidopsis molybdopterin biosynthesis protein CNX5 collaborates with the ubiquitin-like protein URM11 in the thio-modification of tRNA. *J Biol Chem* 287: 30874–30884.
17. Zhao Y, Dai X, Blackwell HE, Schreiber SL, Chory J (2003) SIR1, an upstream component in auxin signaling identified by chemical genetics. *Science* 301: 1107–1110.
18. Teschner J, Lachmann N, Schulze J, Geisler M, Selbach K, et al. (2010) A novel role for Arabidopsis mitochondrial ABC transporter ATM3 in molybdenum cofactor biosynthesis. *Plant Cell* 22: 468–480.
19. Leiber RM, John F, Verherbruggen Y, Diet A, Knox JP, et al. (2010) The TOR pathway modulates the structure of cell walls in Arabidopsis. *Plant Cell* 22: 1898–1908.
20. Huh WK, Falvo JV, Gerke LC, Carroll AS, Howson RW, et al. (2003) Global analysis of protein localization in budding yeast. *Nature* 425: 686–691.
21. Zimmermann P, Hirsch-Hoffmann M, Hennig L, Gruissem W (2004) GENEVESTIGATOR. Arabidopsis microarray database and analysis toolbox. *Plant Physiol* 136: 2621–2632.
22. Goehring AS, Rivers DM, Sprague GF (2003a) Urm1ylation: a ubiquitin-like pathway that functions during invasive growth and budding in yeast. *Mol Biol Cell* 14: 4329–4341.
23. Peret B, De Rybel B, Casimiro I, Benkova E, Swarup R, et al. (2009) Arabidopsis lateral root development: an emerging story. *Trends Plant Sci* 14: 399–408.
24. De Smet I (2012) Lateral root initiation: one step at a time. *New Phytol* 193: 867–873.
25. Nibau C, Gibbs DJ, Coates JC (2008) Branching out in new directions: the control of root architecture by lateral root formation. *New Phytol* 179: 595–614.
26. Baumberg N, Ringli C, Keller B (2001) The chimeric leucine-rich repeat/ extensin cell wall protein LRX1 is required for root hair morphogenesis in *Arabidopsis thaliana*. *Genes Dev* 15: 1128–1139.
27. Baumberg N, Steiner M, Ryser U, Keller B, Ringli C (2003) Synergistic interaction of the two paralogous Arabidopsis genes *LRX1* and *LRX2* in cell wall formation during root hair development. *Plant J* 35: 71–81.
28. Ringli C (2005) The role of extracellular LRR-extensin (LRX) proteins in cell wall formation. *Plant Biosyst* 139: 32–35.
29. Wullschlegel S, Loewith R, Hall MN (2006) TOR signaling in growth and metabolism. *Cell* 127: 5–19.
30. Huynh LN, Thangavel M, Chen T, Cottrell R, Mitchell JM, et al. (2010) Linking tRNA localization with activation of nutritional stress responses. *Cell Cycle* 9: 3112–3118.
31. Huang S, Bjornsti MA, Houghton PJ (2003) Rapamycins. *Cancer Biol Ther* 2: 222–232.
32. Ren MZ, Venglat P, Qiu SQ, Feng L, Cao YG, et al. (2012) Target of Rapamycin Signaling Regulates Metabolism, Growth, and Life Span in Arabidopsis. *Plant Cell* 24: 4850–4874.
33. Xiong Y, Sheen J (2012) Rapamycin and glucose-target of rapamycin (TOR) protein signaling in plants. *J Biol Chem* 287: 2836–2842.
34. Krause K, Krupinska K (2009) Nuclear regulators with a second home in organelles. *Trends Plant Sci* 14: 194–199.
35. Petroski MD, Salvesen GS, Wolf DA (2011) Urm1 couples sulfur transfer to ubiquitin-like protein function in oxidative stress. *Proc Natl Acad Sci USA* 108: 1749–1750.
36. Minet M, Dufour ME, Lacroute F (1992) Cloning and sequencing of a human cDNA coding for dihydroorotate dehydrogenase by complementation of the corresponding yeast mutant. *Gene* 121: 393–396.
37. Gleave AP (1992) A versatile binary vector system with a T-DNA organisational structure conducive to efficient integration of cloned DNA into the plant genome. *Plant Mol Biol* 20: 1203–1207.
38. Stintzi A, Browse J (2000) The Arabidopsis male-sterile mutant, *opr3*, lacks the 12-oxophytodienoic acid reductase required for jasmonate synthesis. *Proc Natl Acad Sci USA* 97: 10625–10630.
39. Curtis MD, Grossniklaus U (2003) A gateway cloning vector set for high-throughput functional analysis of genes in plants. *Plant Physiol* 133: 462–469.
40. Becker D, Kemper E, Schell J, Masterson R (1992) New plant binary vectors with selectable markers located proximal to the left T-DNA border. *Plant Mol Biol* 20: 1195–1197.
41. Diet A, Brunner S, Ringli C (2004) The *enl* mutants enhance the *lrx1* root hair mutant phenotype of *Arabidopsis thaliana*. *Plant Cell Physiol* 45: 734–741.
42. Escobar-Restrepo JM, Huck N, Kessler S, Gagliardini V, Gheyselsinck J, et al. (2007) The FERONIA receptor-like kinase mediates male-female interactions during pollen tube reception. *Science* 317: 656–660.
43. Xu F, Xu S, Wiermer M, Zhang Y, Li X (2012) The cyclin L homolog MOS12 and the MOS4-associated complex are required for the proper splicing of plant resistance genes. *Plant J* 70: 916–928.
44. Ringli C (2010) The hydroxyproline-rich glycoprotein domain of the Arabidopsis LRX1 requires Tyr for function but not for insolubilization in the cell wall. *Plant J* 63: 662–669.
